# Supplementary material
Source: PubMed Central journal article supplement (PMC4259861)
Supplement: NIHMS639569-supplement.pdf [file NIHMS639569-supplement.pdf]

Supplementary Information for

**The mechanosensitive channel of small conductance (MscS) functions as a Jack-In-The-Box**

Hannah R. Malcolm<sup>a,b</sup>, Paul Blount<sup>b</sup>, Joshua A. Maurer<sup>a</sup>

<sup>a</sup>Department of Chemistry, Washington University in St. Louis, MO 63130

<sup>b</sup>Department of Physiology, University of Texas Southwestern Medical Center, Dallas, TX, 75390-9040

|                          | Forward                                              | Reverse                                               |
|--------------------------|------------------------------------------------------|-------------------------------------------------------|
| V29A                     | GCTGCTAAGTTATGCAGCAA<br>ACATCGTGGCGGCACTCGCG<br>GTC  | GACCGCGAGTGCCGCCACGA<br>TGTTTGCTGCATAACTTAGCA<br>GC   |
| V29L                     | TGCTGCTAAGTTATGCATTA<br>AACATCGTGGCGGCACTCGC<br>GGTC | GACCGCGAGTGCCGCCACGA<br>TGTTTAATGCATAACTTAGC<br>AGCA  |
| V32A                     | ATGCAGTAAACATCGCGGCG<br>GCACTCGCGG                   | CCGCGAGTGCCGCCGCGATG<br>TTTACTGCAT                    |
| V32L                     | AAGTTATGCAGTAAACATCT<br>TGGCGGCACTCGCGG              | CCGCGAGTGCCGCCAAGATG<br>TTTACTGCATAACTT               |
| A36L                     | GTAACATCGTGGCGGCACT<br>CCTAATCATCATCGTTGGTTT<br>GATT | AATCAAACCAACGATGATGA<br>TTAGGAGTGCCGCCACGATG<br>TTTAC |
| V40A                     | ACTCGCGGTCATCATCGCTG<br>GTTTGATTATCGCGC              | GCGCGATAATCAAACCAGCG<br>ATGATGACCGCGAGT               |
| V40L                     | CACTCGCGGTCATCATCCTTG<br>GTTTGATTATCGCG              | CGCGATAATCAAACCAAGGA<br>TGATGACCGCGAGTG               |
| I43L                     | GGTCATCATCGTTGGTTTGCT<br>TATCGCGCGGATGATTTT          | GAAATCATCCGCGCGATAAG<br>CAAACCAACGATGATGACC           |
| I44L                     | CGGTCATCATCGTTGGTTTGA<br>TTCTCGCGCGGATGA             | TCATCCGCGCGAGAATCAAA<br>CCAACGATGATGACCG              |
| M47A                     | GGTTTGATTATCGCGCGGGC<br>GATATCCAACGCGGTGAA           | TTCACCGCGTTGGATATCGC<br>CCGCGCGATAATCAAACC            |
| M47L                     | GTTTGATTATCGCGCGGTTG<br>ATATCCAACGCGGTG              | CACCGCGTTGGATATCAACC<br>GCGCGATAATCAAAC               |
| A51L                     | CGCGCGGATGATATCCAACC<br>TAGTGAATCGCCTGATGATC<br>T    | AGATCATCAGGCGATTCACT<br>AGGTTGGATATCATCCGCGC<br>G     |
| N53A                     | TGATATCCAACGCGGTGGCT<br>CGCCTGATGATCTCCC             | GGGAGATCATCAGGCGAGCC<br>ACCGCGTTGGATATCA              |
| N53L                     | GATGATATCCAACGCGGTGC<br>TACGCCTGATGATCTCCCGT<br>A    | TACGGGAGATCATCAGGCGT<br>AGCACCGCGTTGGATATCAT<br>C     |
| L55A                     | CCAACGCGGTGAATCGCGCG<br>ATGATCTCCCGTAAAATA           | TATTTTACGGGAGATCATCG<br>CGCGATTCACCGCGTTGG            |
| S58A                     | GTGAATCGCCTGATGATCGC<br>CCGTAAAATAGATG               | CATCTATTTTACGGGCGATC<br>ATCAGGCGATTAC                 |
| S58L                     | GCGGTGAATCGCCTGATGAT<br>CTTACGTAAAATAGATGCC          | GGCATCTATTTTACGTAAGA<br>TCATCAGGCGATTACCGC            |
| Outer cloning<br>primers | CAATTTACACAGGAAACAG<br>GC                            | TACACGGAGGCATCAGTGAC<br>CAA                           |

**Table S1:** PCR primers for point mutations to alanine or leucine to MscS in the pB10b vector.

|               | Percent Recovery |
|---------------|------------------|
| MscS          | 106 ± 9 %        |
| V29A          | 118 ± 9 %        |
| V29L          | 100 ± 1 %        |
| V32A          | 104 ± 8 %        |
| V32L          | 103 ± 6 %        |
| A36L          | 103 ± 4 %        |
| V40A          | 107 ± 8 %        |
| V40L          | 101 ± 9 %        |
| I43A          | 75 ± 7 %         |
| I43L          | 112 ± 12 %       |
| I44A          | 91 ± 11 %        |
| I44L          | 105 ± 3 %        |
| M47A          | 98 ± 8 %         |
| M47L          | 103 ± 7 %        |
| A51L          | 95 ± 4 %         |
| N53A          | 100 ± 5 %        |
| N53L          | 92 ± 3 %         |
| L55A          | 100 ± 5 %        |
| S58A          | 93 ± 6 %         |
| S58L          | 106 ± 6 %        |
| Empty Plasmid | 7±1 %            |

**Table S2:** Results from osmotic downshock analysis of wildtype MscS and MscS harboring mutations of lipid lining residues mutated to either alanine or leucine. Error bars represent the standard error of the mean for 6 independent trials.

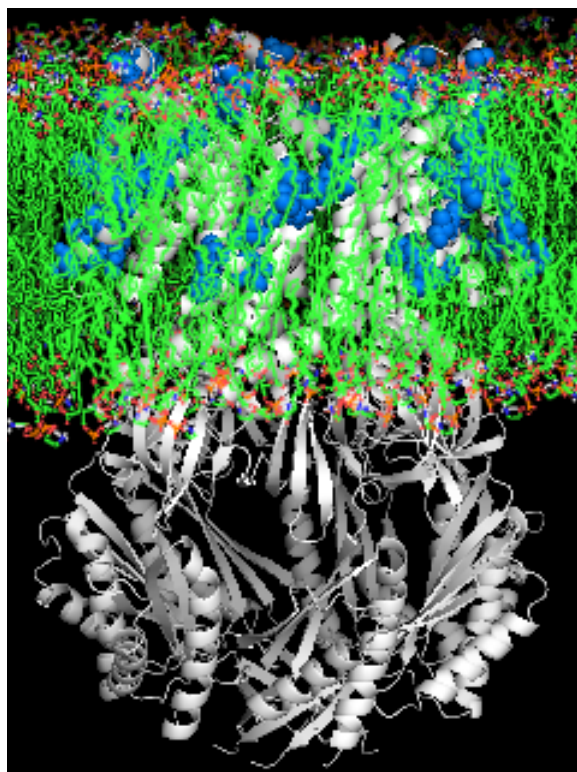

**Figure S1:** Open state lipid interactions. The open state crystal structure of MscS is shown embedded into a POPE membrane with the predicted lipid interacting residues (V29, V32, A36, V40, I43, I44, M47, A51, N53, L55, and S58) highlighted in blue [1].

|      | LB+Ap            |                  |                  |                  |                  |                  |                  | Un-induced Score | LB+IPTG+Ap       |                  |                  |                  |                  |  |  | Induced Score | Ratio   | Steady State at OD <sub>600</sub> |
|------|------------------|------------------|------------------|------------------|------------------|------------------|------------------|------------------|------------------|------------------|------------------|------------------|------------------|--|--|---------------|---------|-----------------------------------|
|      | 10 <sup>-2</sup> | 10 <sup>-3</sup> | 10 <sup>-4</sup> | 10 <sup>-5</sup> | 10 <sup>-6</sup> | 10 <sup>-7</sup> | 10 <sup>-2</sup> |                  | 10 <sup>-3</sup> | 10 <sup>-4</sup> | 10 <sup>-5</sup> | 10 <sup>-6</sup> | 10 <sup>-7</sup> |  |  |               |         |                                   |
| MscS |                  |                  |                  |                  |                  |                  |                  | 4.0±0.8          |                  |                  |                  |                  |                  |  |  | 3.5±0.6       | 0.9±0.2 | 1.74±0.02                         |
| V29A |                  |                  |                  |                  |                  |                  |                  | 4.0±0.0          |                  |                  |                  |                  |                  |  |  | 4.5±1.0       | 1.1±0.3 | 1.69±0.05                         |
| V29L |                  |                  |                  |                  |                  |                  |                  | 4.25±0.5         |                  |                  |                  |                  |                  |  |  | 4.0±0.0       | 0.9±0.1 | 1.69±0.02                         |
| V32A |                  |                  |                  |                  |                  |                  |                  | 4.25±0.5         |                  |                  |                  |                  |                  |  |  | 3.75±1.0      | 0.9±0.3 | 1.67±0.02                         |
| V32L |                  |                  |                  |                  |                  |                  |                  | 4.25±0.5         |                  |                  |                  |                  |                  |  |  | 4.0±0.0       | 0.9±0.1 | 1.69±0.01                         |
| A36L |                  |                  |                  |                  |                  |                  |                  | 4.0±0.0          |                  |                  |                  |                  |                  |  |  | 3.75±1.0      | 0.9±0.2 | 1.71±0.03                         |
| V40A |                  |                  |                  |                  |                  |                  |                  | 3.75±1.0         |                  |                  |                  |                  |                  |  |  | 4.0±0.8       | 1.1±0.4 | 1.67±0.02                         |
| V40L |                  |                  |                  |                  |                  |                  |                  | 4.25±0.5         |                  |                  |                  |                  |                  |  |  | 3.75±0.5      | 0.9±0.2 | 1.66±0.01                         |
| I43A |                  |                  |                  |                  |                  |                  |                  | 4.25±0.5         |                  |                  |                  |                  |                  |  |  | 3.75±1.0      | 0.9±0.3 | 1.65±0.03                         |
| I43L |                  |                  |                  |                  |                  |                  |                  | 3.75±1.0         |                  |                  |                  |                  |                  |  |  | 4.0±0.0       | 1.1±0.3 | 1.69±0.02                         |
| I44A |                  |                  |                  |                  |                  |                  |                  | 3.75±0.5         |                  |                  |                  |                  |                  |  |  | 4.25±0.5      | 1.1±0.2 | 1.66±0.05                         |
| I44L |                  |                  |                  |                  |                  |                  |                  | 4.5±0.6          |                  |                  |                  |                  |                  |  |  | 3.5±0.6       | 0.8±0.2 | 1.69±0.05                         |
| M47A |                  |                  |                  |                  |                  |                  |                  | 3.5±0.6          |                  |                  |                  |                  |                  |  |  | 4.25±0.5      | 1.2±0.3 | 1.68±0.01                         |
| M47L |                  |                  |                  |                  |                  |                  |                  | 4.25±0.5         |                  |                  |                  |                  |                  |  |  | 3.75±0.5      | 0.9±0.2 | 1.65±0.02                         |
| A51L |                  |                  |                  |                  |                  |                  |                  | 3.5±0.6          |                  |                  |                  |                  |                  |  |  | 3.75±0.5      | 1.1±0.2 | 1.63±0.03                         |
| N53A |                  |                  |                  |                  |                  |                  |                  | 3.75±0.5         |                  |                  |                  |                  |                  |  |  | 4.5±0.6       | 1.2±0.2 | 1.63±0.04                         |
| N53L |                  |                  |                  |                  |                  |                  |                  | 4.25±0.5         |                  |                  |                  |                  |                  |  |  | 4.0±0.0       | 0.9±0.1 | 1.66±0.03                         |
| L55A |                  |                  |                  |                  |                  |                  |                  | 4.25±0.5         |                  |                  |                  |                  |                  |  |  | 4.25±0.5      | 1.1±0.2 | 1.66±0.02                         |
| S58A |                  |                  |                  |                  |                  |                  |                  | 4.0±0.0          |                  |                  |                  |                  |                  |  |  | 4.25±0.5      | 1.1±0.1 | 1.66±0.04                         |
| S58L |                  |                  |                  |                  |                  |                  |                  | 4.0±0.8          |                  |                  |                  |                  |                  |  |  | 3.75±0.5      | 0.9±0.2 | 1.65±0.07                         |

**Figure S2:** Gain of function analysis of MscS mutations. Representative bacteria growth on LB medium with and without IPTG is shown for all mutations. Plates were scored by counting the number of dilutions with bacterial growth. The ratio of induced to uninduced was determined by dividing the induced score by the uninduced score. The steady state optical density was measured at 600 nm. In all cases, error represents the standard deviation for four independent trials.

**References**

- [1] W. Wang, S.S. Black, M.D. Edwards, S. Miller, E.L. Morrison, W. Bartlett, C. Dong, J.H. Naismith, I.R. Booth, The structure of an open form of an E. coli mechanosensitive channel at 3.45 Å resolution, *Science*, 321 (2008) 1179-1183.
